# Supplementary material for: Implementing radical cure diagnostics for malaria: user perspectives on G6PD testing in Bangladesh
Source: Springer Nature journal article supplement (doi:10.1186/s12936-021-03743-w), 2021-05-12
Supplement: MOESM2 [file 19158156]

*Disclaimer: Developed by University of Maastricht (the Netherlands, Nora Engel & Cristian Ghergu) in collaboration with FIND (Switzerland), the Menzies School of Health Research (Australia) and the icddr.b (Bangladesh), for the use in training workshops on the STANDARD™ G6PD test. This document may be freely reviewed, quoted, reproduced or translated, in part or in full, provided the source is acknowledged.*

Interview guide healthworkers

| Questions/Probes                                                                                                                                                                                                                                                                                                                                                                                                                                                                                                                                                                                                                                                                                                                                                                                                                                                                                                                                                                                                                                                                                                                                                                                                                                                                                                                                                                                                                                                                                                                                                                                                                                                                                                                                                                                                                                                                                                                                                                                                                                                                                                                                     | Information we are looking for                                                                                                                                                                                                                                                                                                                                                                                                                                                                                                                                                                                                                                                                                                                                                |
|------------------------------------------------------------------------------------------------------------------------------------------------------------------------------------------------------------------------------------------------------------------------------------------------------------------------------------------------------------------------------------------------------------------------------------------------------------------------------------------------------------------------------------------------------------------------------------------------------------------------------------------------------------------------------------------------------------------------------------------------------------------------------------------------------------------------------------------------------------------------------------------------------------------------------------------------------------------------------------------------------------------------------------------------------------------------------------------------------------------------------------------------------------------------------------------------------------------------------------------------------------------------------------------------------------------------------------------------------------------------------------------------------------------------------------------------------------------------------------------------------------------------------------------------------------------------------------------------------------------------------------------------------------------------------------------------------------------------------------------------------------------------------------------------------------------------------------------------------------------------------------------------------------------------------------------------------------------------------------------------------------------------------------------------------------------------------------------------------------------------------------------------------|-------------------------------------------------------------------------------------------------------------------------------------------------------------------------------------------------------------------------------------------------------------------------------------------------------------------------------------------------------------------------------------------------------------------------------------------------------------------------------------------------------------------------------------------------------------------------------------------------------------------------------------------------------------------------------------------------------------------------------------------------------------------------------|
| <p><u>How does a regular day of work look like for you?</u></p> <ul style="list-style-type: none"> <li>○ Chronological account. If fitting, probe for responsibilities, interactions.</li> </ul>                                                                                                                                                                                                                                                                                                                                                                                                                                                                                                                                                                                                                                                                                                                                                                                                                                                                                                                                                                                                                                                                                                                                                                                                                                                                                                                                                                                                                                                                                                                                                                                                                                                                                                                                                                                                                                                                                                                                                     | <p>Roles<br/>Responsibilities<br/>Interactions (staff, patients, diseases)</p>                                                                                                                                                                                                                                                                                                                                                                                                                                                                                                                                                                                                                                                                                                |
| <p><u>How would you describe the process of diagnosing and treating malaria?</u></p> <p>[Screening]</p> <ul style="list-style-type: none"> <li>○ From the moment a patient enters the (institution) with malarial symptoms, what happens? Can you please go through steps?</li> <li>- What do you discuss? (What questions do you ask? Do patients also talk about other things?)</li> <li>- What do you record?</li> <li>- Who is involved?</li> </ul> <p>How do you decide if the patient needs a diagnostic?/ are all patients presenting with fever tested?</p> <p>[Diagnosing]</p> <ul style="list-style-type: none"> <li>○ What tests do you use for diagnosing malaria? <ul style="list-style-type: none"> <li>○ Who is involved? (Lab?)</li> <li>○ Time required? (TAT, until you get results)</li> <li>○ How do you record?</li> </ul> </li> <li>○ Does it ever happen that patients demand a specific test? When? Who? Why?</li> <li>○ Examples? Common/unusual decisions?</li> </ul> <p>[Treatment decisions?]</p> <ul style="list-style-type: none"> <li>○ Once you have the test result, what happens next?</li> <li>○ Who is involved?</li> <li>○ How do you treat for Pf and Pv and mixed? <ul style="list-style-type: none"> <li>- When are decisions made?</li> <li>- Who does them?</li> <li>- Based on what information?</li> </ul> </li> <li>○ Does it ever happen that patients demand a specific treatment? When? Who? Why?</li> <li>○ Examples? Common/unusual decisions?</li> <li>○ Does it ever happen to initiate treatment without testing?</li> </ul> <p>[Primaquine treatment]</p> <ul style="list-style-type: none"> <li>○ Do you use Primaquine treatment on a regular basis? <ul style="list-style-type: none"> <li>- Since when?</li> <li>- How do you decide to use it? On what patients, when? Other considerations?)</li> <li>- Who gives it? What information accompanies it?</li> <li>- What are your experiences with the treatment? How about challenges?</li> <li>- What do patients think about receiving primaquine treatment?</li> <li>- Are there any challenges with the costs?</li> </ul> </li> </ul> | <p>Experiences and challenges of seeking care, screening, testing, diagnosing, treating malaria in work context.</p> <ul style="list-style-type: none"> <li>● Steps performed</li> <li>● Relevant actors involved, and their interaction: patients, laboratory staff, tests/other technology involved, referral mechanisms, others</li> <li>● Experience and challenges with diagnostic process generally, and tests in particular</li> <li>● Information coming up at different steps, recording, decision making</li> <li>● Possible improvements</li> <li>● Primaquine treatment practices; understanding of risks associated with the treatment; patient responses</li> <li>● Interactions with patients, communication about diagnostics, results, risks, etc</li> </ul> |

|                                                                                                                                                                                                                                                                                                                                                                                                                                                                                                                                                                                                                                                                                                                                                              |                                                                                                                                                                                                                                                                                                                                                                                                                                                                                                                                                                                                                                                                                                                                                                                                                                                                                                                                                                         |                                                                                                                                                                                                                                                                                                                                                                                                                                   |
|--------------------------------------------------------------------------------------------------------------------------------------------------------------------------------------------------------------------------------------------------------------------------------------------------------------------------------------------------------------------------------------------------------------------------------------------------------------------------------------------------------------------------------------------------------------------------------------------------------------------------------------------------------------------------------------------------------------------------------------------------------------|-------------------------------------------------------------------------------------------------------------------------------------------------------------------------------------------------------------------------------------------------------------------------------------------------------------------------------------------------------------------------------------------------------------------------------------------------------------------------------------------------------------------------------------------------------------------------------------------------------------------------------------------------------------------------------------------------------------------------------------------------------------------------------------------------------------------------------------------------------------------------------------------------------------------------------------------------------------------------|-----------------------------------------------------------------------------------------------------------------------------------------------------------------------------------------------------------------------------------------------------------------------------------------------------------------------------------------------------------------------------------------------------------------------------------|
|                                                                                                                                                                                                                                                                                                                                                                                                                                                                                                                                                                                                                                                                                                                                                              | <ul style="list-style-type: none"> <li>- Do you think it is a useful treatment?</li> <li>- Did you ever switch patients <ul style="list-style-type: none"> <li>o To another treatment midway?</li> <li>o Abort treatment</li> <li>o Why/how?</li> </ul> </li> <li>o Is G6PD deficiency or haemolysis a concern when deciding on treatment? How do you include it in your treatment decision?</li> <li>o Can you let me know the key symptoms suggestive of an acute haemolytic episode?</li> <li>- Did you ever experience or hear about patients that had drug induced haemolysis after getting treated with primaquine?</li> <li>- How are haemolysis risks addressed? Examples (testing? discussions with patients? concerns)?</li> <li>- Who is involved in monitoring (treatment follow-up)? How is it done? (during/after treatment, what do patients do, where do they go, who else is involved?). What happens if a patient has haemolytic symptoms?</li> </ul> |                                                                                                                                                                                                                                                                                                                                                                                                                                   |
|                                                                                                                                                                                                                                                                                                                                                                                                                                                                                                                                                                                                                                                                                                                                                              | <p>Implementation processes</p> <ul style="list-style-type: none"> <li>• Steps performed ( trainings, resources, information, support, accountability mechanisms etc)</li> <li>• Actors involved</li> <li>• Narratives about change (preferences, considerations for, or against)</li> <li>• Decision making process (formal and informal)</li> <li>• Adaptations made during implementation, and after</li> </ul>                                                                                                                                                                                                                                                                                                                                                                                                                                                                                                                                                      |                                                                                                                                                                                                                                                                                                                                                                                                                                   |
| <p><u>Since you work here, have there been any changes in the diagnostic and treatment process in the past?</u></p> <ul style="list-style-type: none"> <li>o What kind? (examples: tests, protocols, treatments)</li> <li>o Why?</li> <li>o How are you informed about changes? Can you please go through the steps of the change? (trainings, resources, information, support, etc)</li> <li>- Who was involved? How?</li> <li>- How did it change your day-to-day practice? Was there an opportunity to give feedback to the decision makers? Did you also have to change things in reporting or recording information? Examples?</li> <li>o Do you have suggestions for improving future implementation of new guidelines/tests or treatments?</li> </ul> |                                                                                                                                                                                                                                                                                                                                                                                                                                                                                                                                                                                                                                                                                                                                                                                                                                                                                                                                                                         | <p><u>Let us start with the training?</u></p> <ul style="list-style-type: none"> <li>o How did you find it?</li> <li>- Training materials,</li> <li>- Experience with trainer,</li> <li>- Theoretical and practical sessions</li> <li>- Duration?</li> <li>- Anything else that stood out from the training?</li> <li>o Usefulness? Preferences? Dislikes? (on delivery and content)</li> <li>o Possible improvements?</li> </ul> |
| <p><u>What did you think about the workshop?</u></p>                                                                                                                                                                                                                                                                                                                                                                                                                                                                                                                                                                                                                                                                                                         | <ul style="list-style-type: none"> <li>- <u>What did you think of the biosensor?</u></li> <li>- Would you consider the test useful? Why (not)?</li> <li>- Who should use the test in your UHC? Anyone else? Why?</li> <li>- What about other</li> </ul>                                                                                                                                                                                                                                                                                                                                                                                                                                                                                                                                                                                                                                                                                                                 | <p>STANDARD™ G6PD test</p> <ul style="list-style-type: none"> <li>• User perspectives on experience with G6PD Biosensor and training materials.</li> </ul>                                                                                                                                                                                                                                                                        |

|  |                                                                                                                                                                                                                                                                                                                                                                                                                                                                                                                                                                                                                                                                                                                                                                                                                                                                                                                                                                                                                                                                                                                                                                                                                                                                                                                                                                                                                                                      |                                                                                                                                                                                                                                                                     |
|--|------------------------------------------------------------------------------------------------------------------------------------------------------------------------------------------------------------------------------------------------------------------------------------------------------------------------------------------------------------------------------------------------------------------------------------------------------------------------------------------------------------------------------------------------------------------------------------------------------------------------------------------------------------------------------------------------------------------------------------------------------------------------------------------------------------------------------------------------------------------------------------------------------------------------------------------------------------------------------------------------------------------------------------------------------------------------------------------------------------------------------------------------------------------------------------------------------------------------------------------------------------------------------------------------------------------------------------------------------------------------------------------------------------------------------------------------------|---------------------------------------------------------------------------------------------------------------------------------------------------------------------------------------------------------------------------------------------------------------------|
|  | <ul style="list-style-type: none"> <li>- Would you use it? Or would you think it should be used by other staff in your facility, or staff at other levels of the health system? Which ones?</li> <li>- Additional materials required?</li> <li>- Preparing the device</li> <li>- Blood collection, preparation, operation</li> <li>- Displaying the results and interpreting them?</li> <li>- Disposal of used consumables – challenge?</li> <li>o Challenges?</li> </ul> <p>Possible areas for improvement?</p>                                                                                                                                                                                                                                                                                                                                                                                                                                                                                                                                                                                                                                                                                                                                                                                                                                                                                                                                     | <ul style="list-style-type: none"> <li>• Information on how would the STANDARD™ G6PD test fit in the work environment and malaria continuum of care.</li> <li>• Preferences and challenges regarding the new test: technology design and implementation.</li> </ul> |
|  | <p>What changes would the G6PD biosensor bring into the malaria diagnostic and treatment process?</p> <ul style="list-style-type: none"> <li>o What changes would the test bring in your current work environment?</li> <li>o What changes would it bring in diagnosing and treating malaria? / And in using Primaquine?</li> <li>o How do you think it would affect: <ul style="list-style-type: none"> <li>- linkage to care</li> <li>- cutting/increasing diagnostic delay</li> <li>- cost concerns</li> <li>- accessibility</li> <li>- (what would the patient think? - patient's experience of care)</li> </ul> </li> <li>o How do you think the test should be best introduced? <ul style="list-style-type: none"> <li>- What changes would have to be made to the test, or training materials to make sure it is introduced and maintained successfully?</li> <li>- How about changes in the hospital?/work environment?</li> <li>- When introducing the test, who should be involved from the hospital? And in what way?</li> <li>- What kind of training would you like to see done? (e.g. how long, contents of the training?)</li> <li>- What kind of follow-up/supervision/refresher activities would you like to see done after the training?</li> </ul> </li> <li>o Would other things be needed, e.g. reduce workload for other activities, need of more staff, assign activities differently to the different staff? Etc.</li> </ul> |                                                                                                                                                                                                                                                                     |
|  | <ul style="list-style-type: none"> <li>- Final points</li> </ul>                                                                                                                                                                                                                                                                                                                                                                                                                                                                                                                                                                                                                                                                                                                                                                                                                                                                                                                                                                                                                                                                                                                                                                                                                                                                                                                                                                                     |                                                                                                                                                                                                                                                                     |
